# Supplementary material for: An Efficient Transformation System for Fast Production of VcCHS Transgenic Blueberry Callus and Its Expressional Analysis
Source: MDPI journal article supplement (doi:10.3390/plants12162905), 2023-08-09
Supplement: s1 [file s1]

## Supplementary File

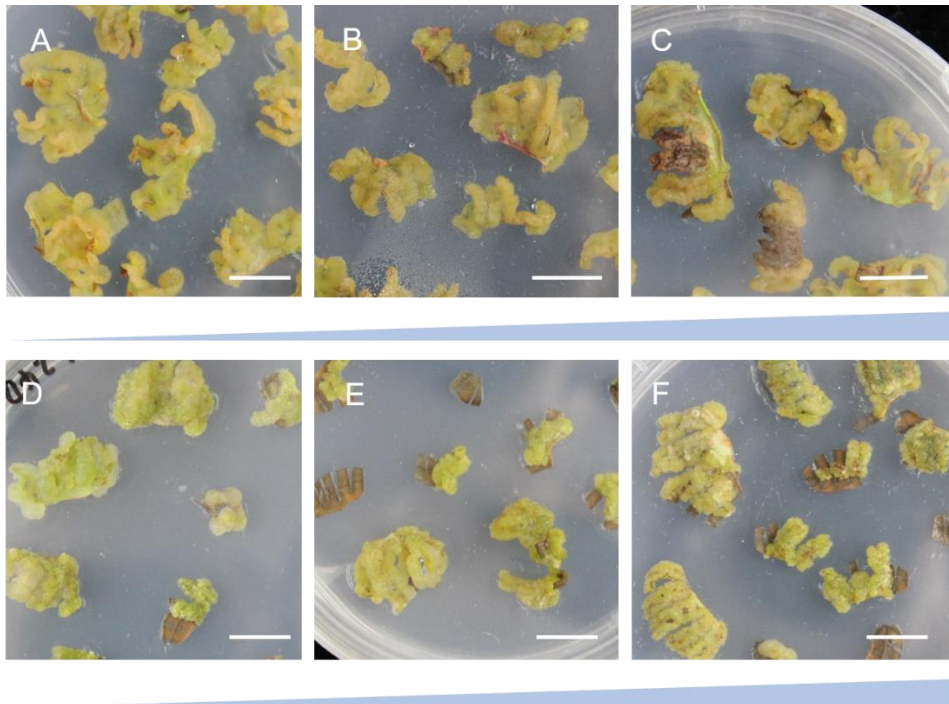

Figure S1 Leaves growth status of *cv.* 'Legacy' in WPM or MS containing different concentrations of 2,4-D

A-C: WPM containing different concentrations of 2,4-D (1, 2, 4 mg·L<sup>-1</sup>); D-F: MS containing different concentrations of 2,4-D (1, 2, 4 mg·L<sup>-1</sup>). The scale in the figure is 1cm.

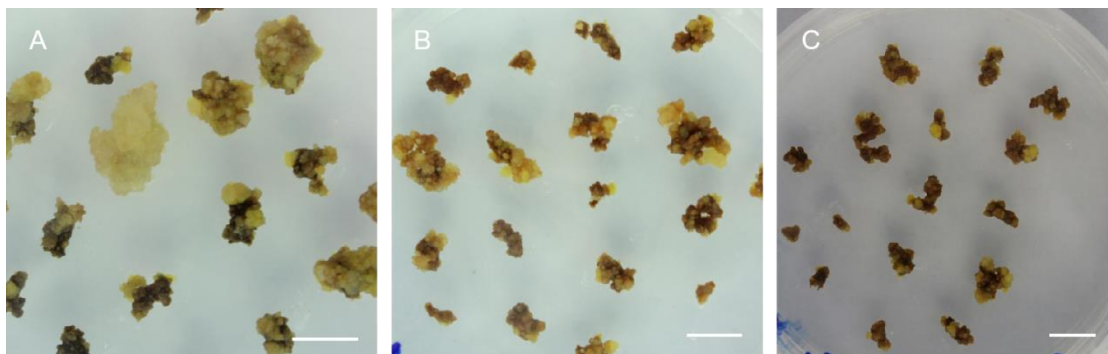

Figure S2 Callus growth status of *cv.* 'Legacy' in WPM containing different concentrations of 2,4-D

A-C: WPM containing different combinations of 2,4-D (1, 2, 4 mg·L<sup>-1</sup>). The scale in the figure is 1cm.

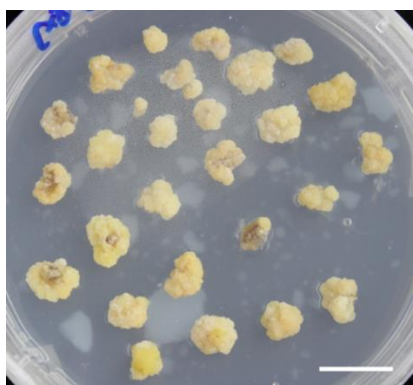

Figure S3 The growth status of callus of cv. 'Legacy' in WPM+1.5 mg·L<sup>-1</sup> 2,4-D+0.4 mg·L<sup>-1</sup> 6-BA medium for 30 days. The scale in the figure is 1 cm.

Table S1 Effects of different combinations of medium and 2,4-D on callus induction for cv. 'Legacy'

| Medium | 2,4-D (mg·L <sup>-1</sup> ) | Cultivation time (d) | Callus induction condition                           |
|--------|-----------------------------|----------------------|------------------------------------------------------|
| MS     | 1                           | 35                   | Leaf curl, leaf surface grow thin light green callus |
|        | 2                           | 35                   |                                                      |
|        | 4                           | 35                   |                                                      |
| WPM    | 1                           | 35                   | Leaf curl, surface and wound developed orange callus |
|        | 2                           | 35                   |                                                      |
|        | 4                           | 35                   |                                                      |

Table S2 Effects of different combinations of plant growth regulator on callus induction for leaves of cv. 'Legacy'

| Medium | 2, 4-D (mg·L <sup>-1</sup> ) | 6-BA (mg·L <sup>-1</sup> ) | Cultivation time (d) | Growth status                                     |
|--------|------------------------------|----------------------------|----------------------|---------------------------------------------------|
| WPM    | 1                            | 0.2                        | 35                   | Orange callus developed from the leaf wounds      |
|        | 1                            | 0.4                        | 35                   | Light yellow callus developed on the leaf surface |
|        | 1                            | 0.6                        | 35                   | Yellow callus developed on leaf surface           |
|        | 1                            | 0.8                        | 35                   | Dark yellow callus developed from leaf wounds     |
|        | 4                            | 0.2                        | 35                   | There was no obvious callus                       |

|   |     |    |                                                                        |
|---|-----|----|------------------------------------------------------------------------|
|   |     |    | inducing from the leaves, and white particles were formed at the wound |
| 4 | 0.4 | 35 |                                                                        |
| 4 | 0.6 | 35 |                                                                        |
| 4 | 0.8 | 35 |                                                                        |

Table S3 Effects of different concentrations of 6-BA on the subculture of callus of *cv.* 'Legacy'

| Medium | 2,4-D (mg·L <sup>-1</sup> ) | 6-BA (mg·L <sup>-1</sup> ) | Cultivation time (d) | Callus growth condition        |
|--------|-----------------------------|----------------------------|----------------------|--------------------------------|
| WPM    | 1.5                         | 0.2                        | 30                   | Pale yellow and grows slowly   |
|        | 1.5                         | 0.4                        | 30                   | Light yellow and grows rapidly |
|        | 1.5                         | 0.6                        | 30                   | light yellow and grows rapidly |
|        | 1.5                         | 0.8                        | 30                   | Pale yellow and grows slowly   |
